# Supplementary material for: Feeding neurons integrate metabolic and reproductive states in mice
Source: PubMed Central journal article supplement (PMC10561062; doi:10.1016/j.isci.2023.107918), 2023-09-14
Supplement: mmc1.pdf [file mmc1.pdf]

**Supplemental information**

**Feeding neurons integrate metabolic  
and reproductive states in mice**

**Megan G. Massa, Rachel L. Scott, Alexandra L. Cara, Laura R. Cortes, Paul B. Vander, Norma P. Sandoval, Jae W. Park, Sahara L. Ali, Leandro M. Velez, Huei-Bin Wang, Shomik S. Ati, Bethlehem Tesfaye, Karen Reue, J. Edward van Veen, Marcus M. Seldin, and Stephanie M. Correa**

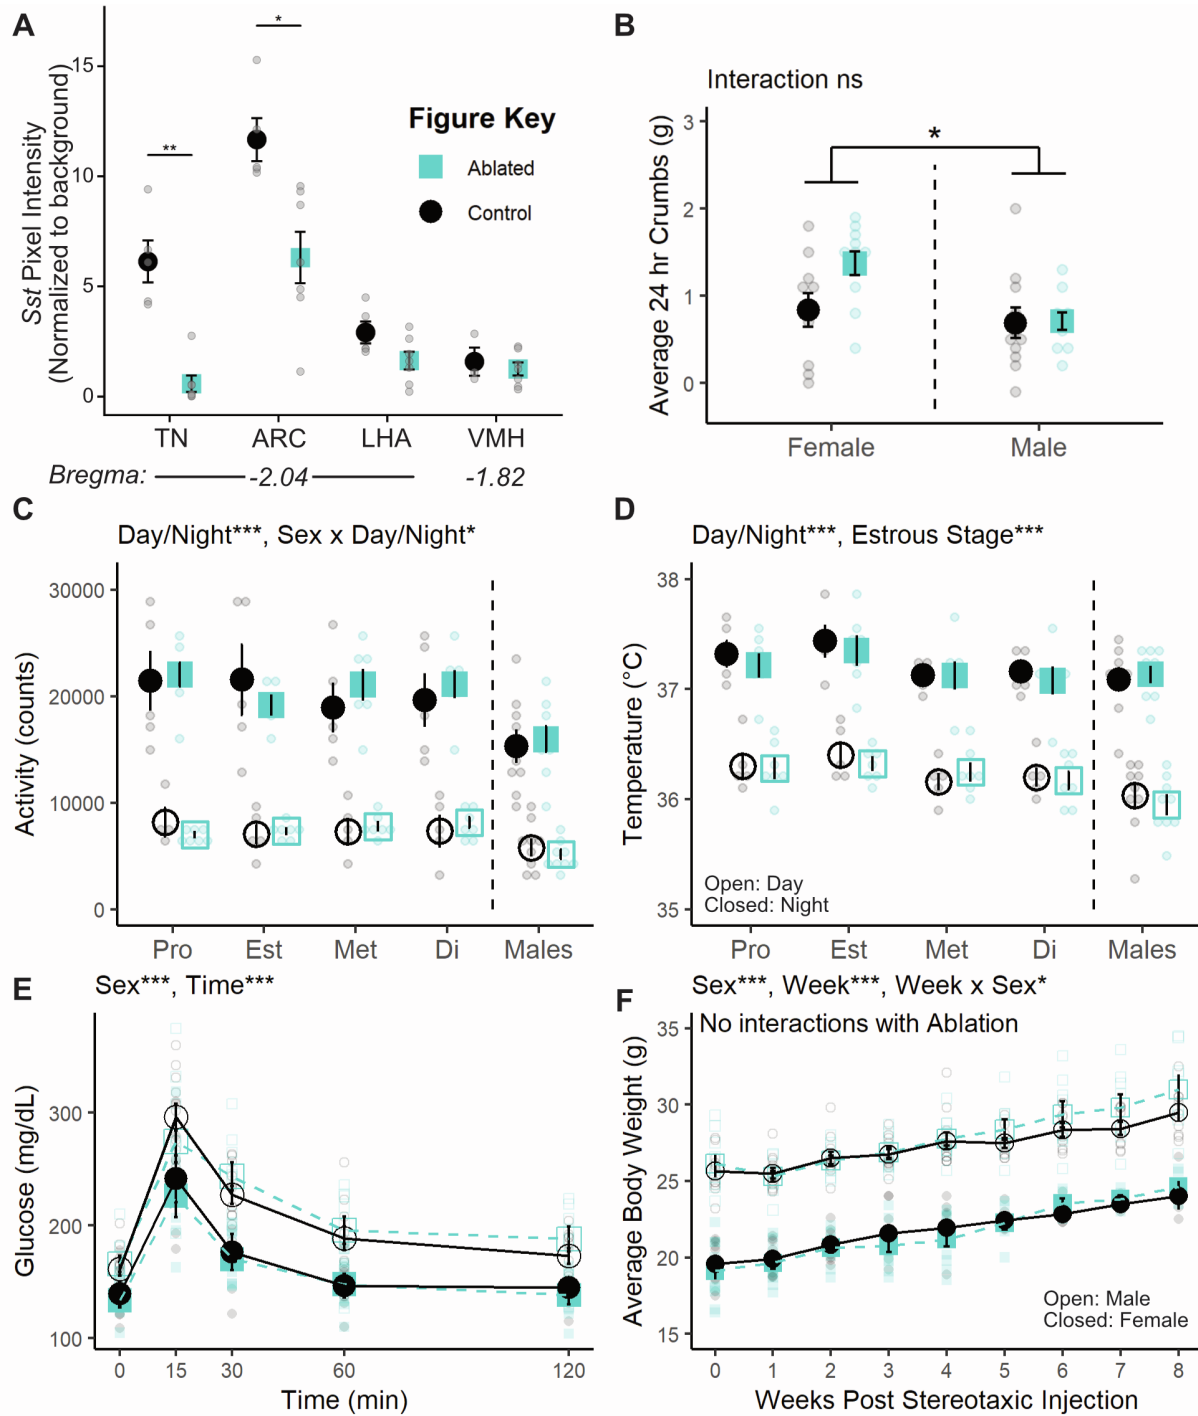

**Figure S1. Other metabolic metrics are unaffected by SST neuron ablation, related to Figure 2.** (A) Ablation significantly decreased *Sst* staining in the TN and the arcuate (ARC) but did not affect expression in the lateral hypothalamic area (LHA) or ventromedial hypothalamus (VMH). (B) Ablation-induced changes in food intake were not accompanied by changes in gnawing without consumption. Telemetry measures of (C) activity and (D) core body temperature are unaffected by SST neuronal ablation. (E) Fasting glucose tolerance test is also unaffected by SST neuron ablation. (F) Despite changes to food intake, ablation does not affect body weight over time. Mean  $\pm$  SEM; ANOVA and post-hoc t-tests where applicable; \*,  $p < 0.5$ ; \*\*\*,  $p < 0.001$ . M Control  $n = 9$ ; M Ablated  $n = 9$ ; F Control  $n = 5$ ; F Ablated  $n = 7$ . Pro: Proestrus, Est: Estrus, Met: Metestrus, Di: Diestrus.

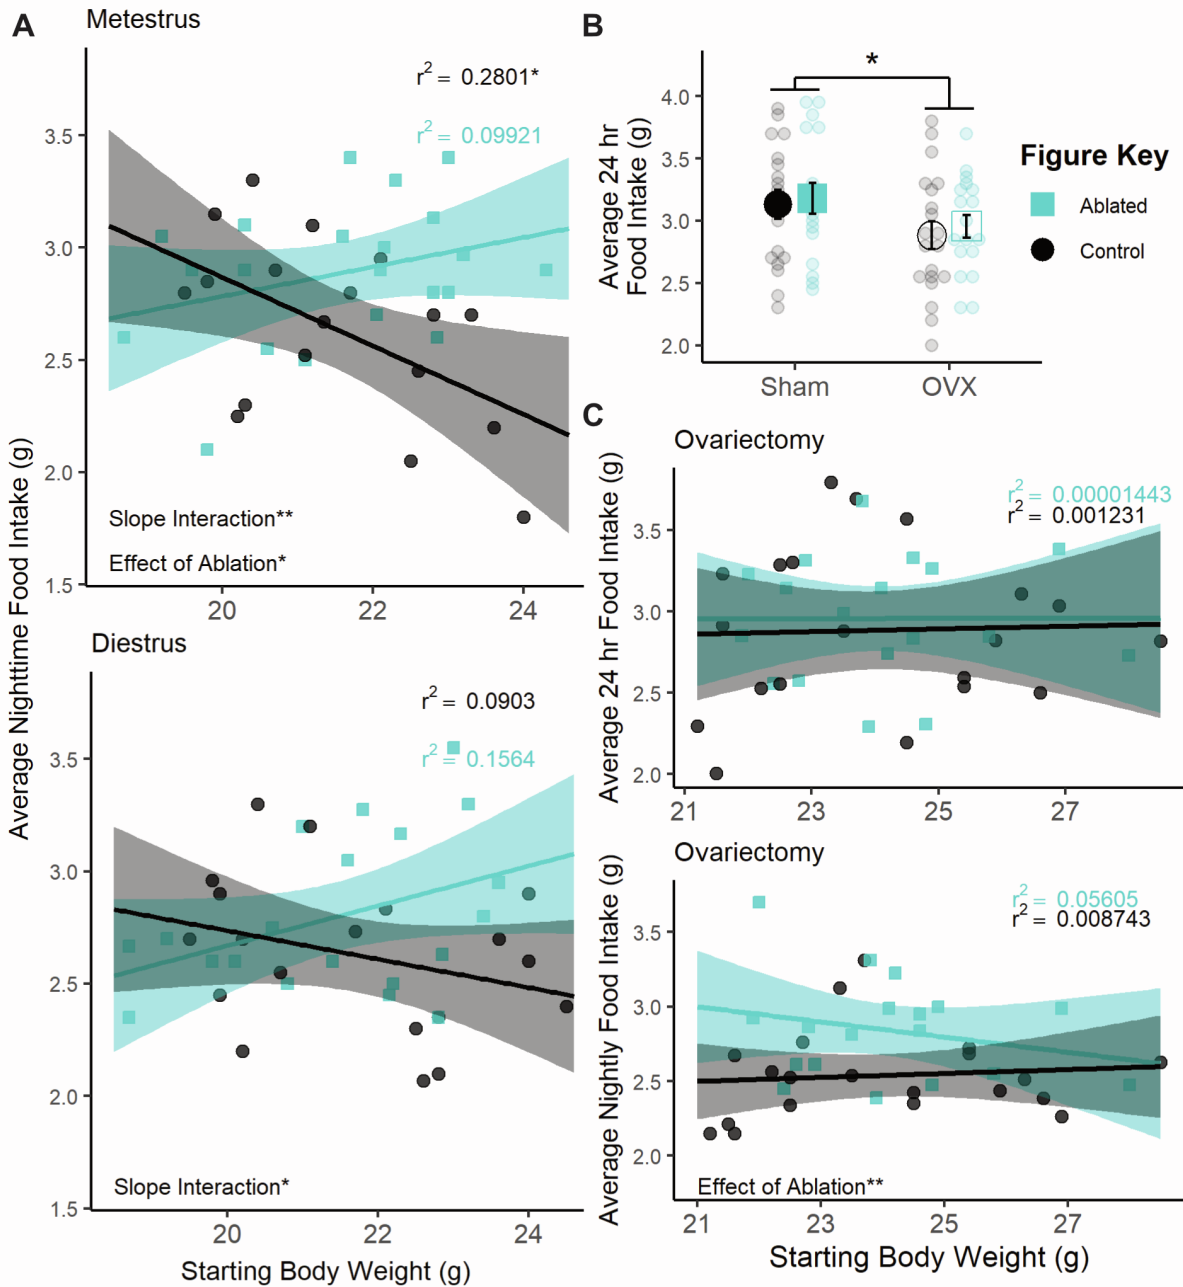

**Figure S2. The effect of SST neuron ablation depends on body mass during phases of elevated estradiol but is masked following sham ovariectomy, related to Figure 3.** (A) Regression analysis of food intake and body mass across all ovary-intact animals in metestrus (top panel) and diestrus (bottom panel) reveals an interaction between body mass and nightly food intake in females. Significant negative correlations in wildtype animals (black line, round black dots) are seen in the higher estradiol phase of metestrus but not in caspase ablated females (cyan line, square cyan points). Metestrus: Control n=18, Ablated n=21; Diestrus: Control n=19, Ablated n=20. (B) Sham vs. ovariectomy (OVX) in combination with caspase ablation failed to recapitulate ablation-mediated decrease in food intake in sham controls, though OVX mice ate less food than sham controls overall. Mean  $\pm$  SEM; ANOVA (C) Food intake over 24 hr (top panel) or in the 12 hr dark phase (bottom panel) was not associated with body mass in either ablated or control animals. Sham: Control n=18, Ablated n=16; OVX: Control n=20, Ablated = 18. (A) & (C) Regression lines depict linear regression  $\pm$  95% CI; ANCOVA; \*p<0.05, \*\*p<0.01

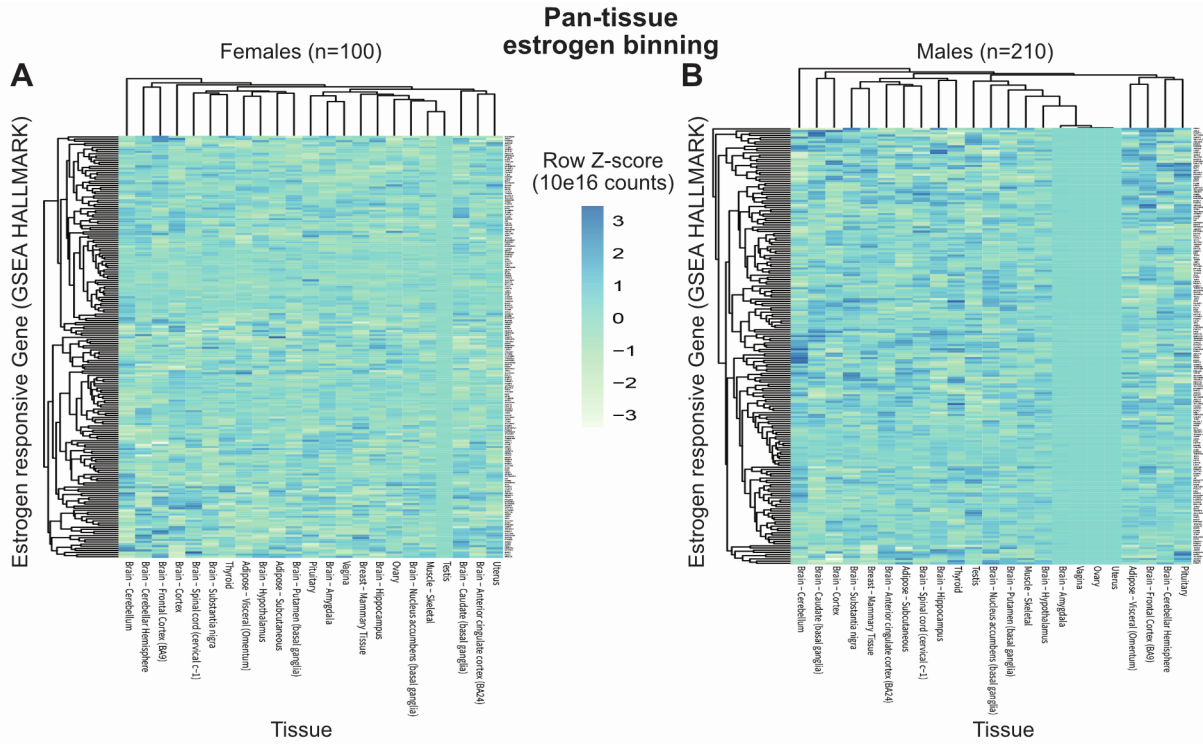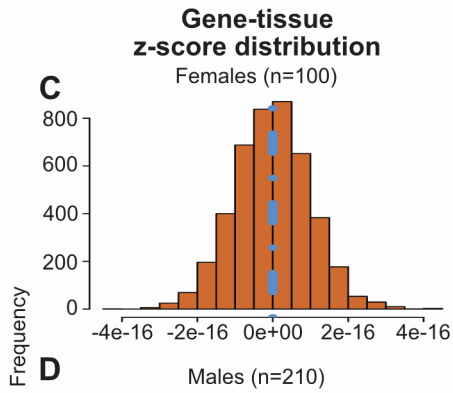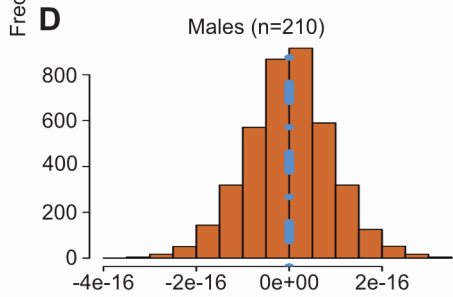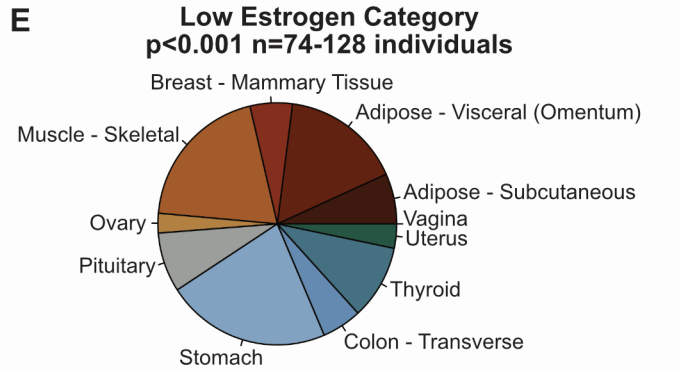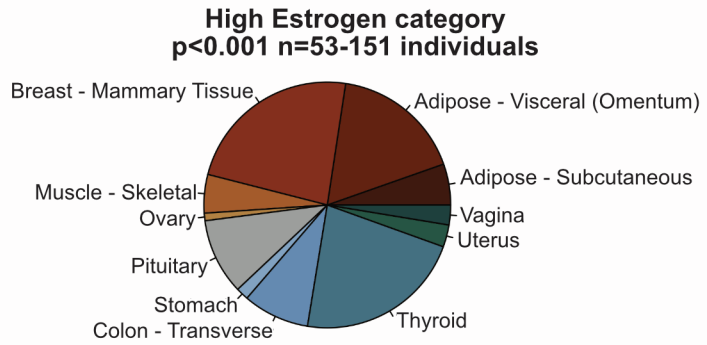

**Tissues with no gene  $p < 0.001$**

Colon - Sigmoid n=38-57 individuals

Liver n=27-41 individuals

Small Intestine - Terminal Ileum n=37-42 individuals

Pancreas n=44-64 individuals

**Figure S3. Binning of GTeX individuals into “high” or “low” circulating estradiol levels, related to Figure 5.** (A&B) Z-scores of estrogen signaling genes (y-axis, [https://www.gsea-msigdb.org/gsea/msigdb/cards/HALLMARK\\_ESTROGEN\\_RESPONSE\\_EARLY.html](https://www.gsea-msigdb.org/gsea/msigdb/cards/HALLMARK_ESTROGEN_RESPONSE_EARLY.html)) across indicated tissues (x-axis) in GTEx female (no Y chromosome, A) and male (Y chromosome present, B) individuals. (C&D) Based on the distributions of these scores across relevant metabolic tissues, individuals were segregated into categories of “low” (<0, left of blue line) or “high” (>0, right of blue line) estrogen signaling and used for cross-tissue genetic correlations. (E) Distribution of DEG co-correlations per tissue in low and high estrogen categories. Tissues with no significant DEG co-correlations tended to have lower sample sizes.
